# Supplementary material
Source: Springer Nature journal article supplement (https://www.springermedizin.de/resource/supplementary/12889_2010_3559_MOESM3_ESM.pdf/9489340)

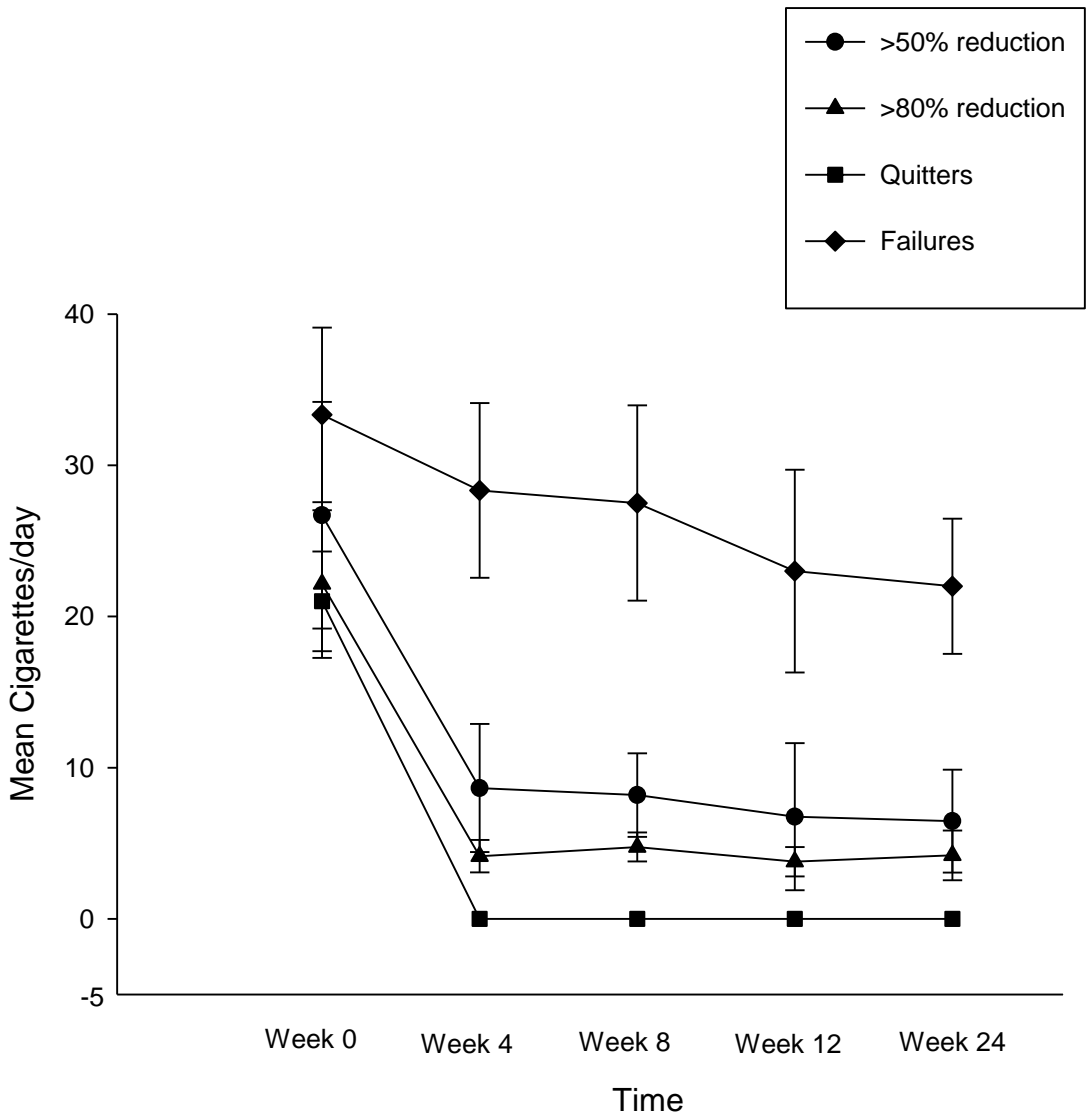

Supplement: MOESM3 [file 9489340]
